# Supplementary material for: MgFeTi-LDH/g-C 3 N 4 composites promote sodium persulfate activation through Fe 3+ /Fe 2+ cycles for efficient tetracycline degradation under visible light irradiation
Source: Royal Society of Chemistry journal article supplement (doi:10.1039/d5nj00442j), 2025-01-01
Supplement: d5nj00442j1.pdf [file d5nj00442j1.pdf]

## Supplementary Informations

### MgFeTi-LDH/g-C<sub>3</sub>N<sub>4</sub> promote sodium persulfate activation through Fe<sup>3+</sup>/Fe<sup>2+</sup> cycle for efficient tetracycline degradation under visible light irradiation

Zihan Wei<sup>a,‡</sup>, Xiaoqian Ren<sup>b,‡</sup>, Tianhong Mei<sup>a</sup>, Rongcheng Xiang<sup>a</sup>, Wugan Wei<sup>a</sup>, Xiaorui Yang<sup>a</sup>,  
Yan Fang<sup>a</sup>, Wenlong Xu<sup>c</sup>, Jianliang Zhu<sup>a</sup>, Jinhua Liang<sup>a\*</sup>

<sup>a</sup> College of Biotechnology and Pharmaceutical Engineering, Nanjing Tech University, Nanjing, 211816, China

<sup>b</sup> College of Chemical Engineering, Nanjing Tech University, Nanjing, 211816, China

<sup>c</sup> Institute of Agricultural Resources and Environment, Jiangsu Academy of Agricultural Sciences, Nanjing, 210014, China

<sup>‡</sup> These two authors contributed equally in composing it.

<sup>\*</sup> Corresponding Authors: College of Biotechnology and Pharmaceutical Engineering, Nanjing Tech University, Nanjing, 211816, China.

E-mail address: jhliang@njtech.edu.cn (J. H. Liang).

## Index

1. Radical-capturing experiment
2. Text toxicity assessment

**Fig. S1** Photocatalytic reaction device

**Fig. S2** Standard curve of TCH

**Fig. S3** the HRTEM image of MgFeTi (3:1)-LDH/g-C<sub>3</sub>N<sub>4</sub>

**Fig. S4** XPS survey spectra of MgFeTi (3:1)-LDH/g-C<sub>3</sub>N<sub>4</sub>

**Fig. S5** CB and VB of the MgFeTi (3:1)-LDH/g-C<sub>3</sub>N<sub>4</sub>

**Fig. S6** kinetics of degradation reaction

**Fig. S7** The effect of various inorganic anions and humate on degradation efficiency

**Fig. S8** The decolorization efficiency of MgFeTi-LDH/g-C<sub>3</sub>N<sub>4</sub> composites for TCH in actual effluents (a) TCH in actual effluents, (b) Decolorized TCH solution

**Fig. S9** Reusability performance of MgFeTi(3:1)-LDH/g-C<sub>3</sub>N<sub>4</sub>

**Fig. S10** The Fe mole percentage from ICP

**Fig. S11** The XRD patterns of recycled MgFeTi(3:1)-LDH/g-C<sub>3</sub>N<sub>4</sub> and fresh MgFeTi(3:1)-LDH/g-C<sub>3</sub>N<sub>4</sub>

**Fig. S12** The effects of various scavengers on (a)  $C_t/C_0$ , (b)  $\ln C_t/C_0$ , (c)  $k$

**Fig. S13** LC-MS spectra of TCH photocatalytic degradation recorded by MgFeTi(3:1)-LDH/g-C<sub>3</sub>N<sub>4</sub> at 0 min

**Fig. S14** LC-MS spectra of TCH photocatalytic degradation recorded by

MgFeTi(3:1)-LDH/g-C<sub>3</sub>N<sub>4</sub> at 30 min

**Fig. S15** Optical density (OD<sub>600</sub>) values of degradation TCH at different time periods over MgFeTi (3:1)-LDH/g-C<sub>3</sub>N<sub>4</sub>

**Tab. S1** The specific surface areas, pore volumes, and pore sizes of catalyst

### 1. Radical-capturing experiment

A radical-capturing experiment is an effective approach to explain the reaction mechanism. Radical capturing agents were added during photocatalytic testing. chloroform (TCM, 10 mmol L<sup>-1</sup>), ethylenediaminetetraacetic acid disodium salt (EDTA-2Na, 10 mmol L<sup>-1</sup>), and methanol (MeOH, 10 mmol L<sup>-1</sup>) were added as scavengers for superoxide radicals ( $\bullet\text{O}_2^-$ ), photo-generated holes ( $\text{h}^+$ ), hydroxyl radicals ( $\bullet\text{OH}$ ).

### 2. Text toxicity assessment

Toxicity assessment is one of the key factors in evaluating the safety of wastewater treatment processes, particularly due to the potential formation of highly toxic intermediates during degradation. In order to determine the toxicity of TCH and intermediates, the toxicity estimation software tool (TEST) was applied to assess ecotoxicity according to various mathematical models of QSAR from Environmental Protection Agency database in US. Here, six toxicity parameters such as acute toxicity of fathead minnow (LC<sub>50</sub>-96 h), daphnia magna 50% lethal dose (LC<sub>50</sub>-48 h), oral rats (LD<sub>50</sub>), bioconcentration factor, developmental toxicity, and mutagenicity are employed to evaluate the toxicity of TCH and degradation intermediates.

Furthermore, this work used OD<sub>600</sub> value to evaluate toxicity of byproducts from TCH degradation. The degradation solution of 20 mg/L TCH was collected for bacterial culturing. *Escherichia coli* DH5 $\alpha$ , a representative model bacterium, was selected to investigate its growth under the presence of TCH degradation solution. This experiment aims to assess the detoxification capacity of the system in treating TCH-contaminated wastewater, particularly focusing on

evaluating the potential of the degradation products to support bacterial growth without causing toxicity. In a typical run, the strain in logarithmic growth stage was inoculated in LB medium for toxicity test. The OD<sub>600</sub> of *Escherichia coli* DH5a was measured to assess toxic inhibition after 24 h incubation at 25 ± 1 °C. All experiments were repeated three times.

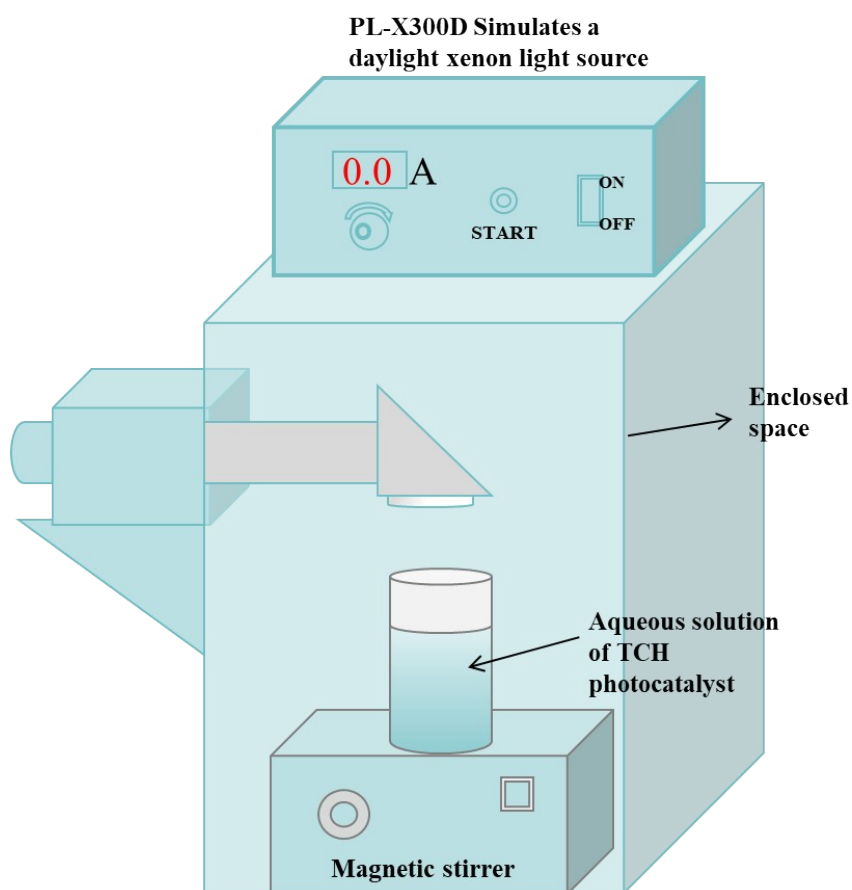

Fig. S1. Photocatalytic reaction device

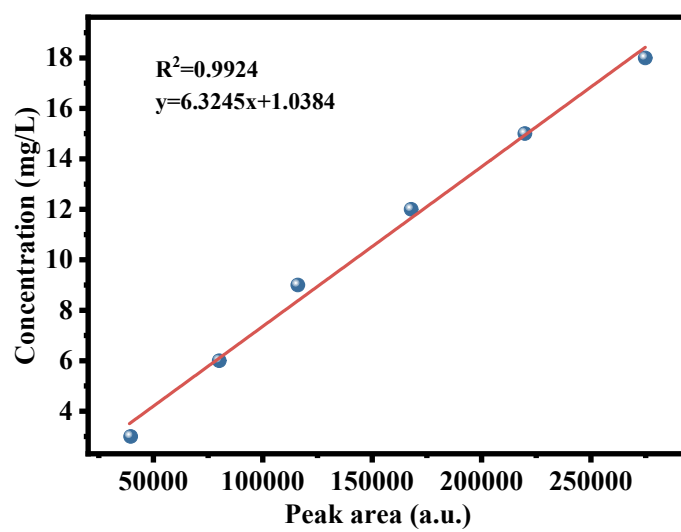

Fig. S2. Standard curve of TCH

Table S1 The specific surface areas, pore volumes, and pore sizes of catalyst

| Sample                                          | Specific surface area(m <sup>2</sup> /g) | Pore volume(cm <sup>3</sup> /g) | Pore size (nm) |
|-------------------------------------------------|------------------------------------------|---------------------------------|----------------|
| g-C <sub>3</sub> N <sub>4</sub>                 | 53.8                                     | 0.16                            | 16.7           |
| MgFeTi(3:1)-LDH                                 | 99.1                                     | 0.08                            | 5.2            |
| MgFeTi(3:1)-LDH/g-C <sub>3</sub> N <sub>4</sub> | 83.2                                     | 0.42                            | 13.6           |

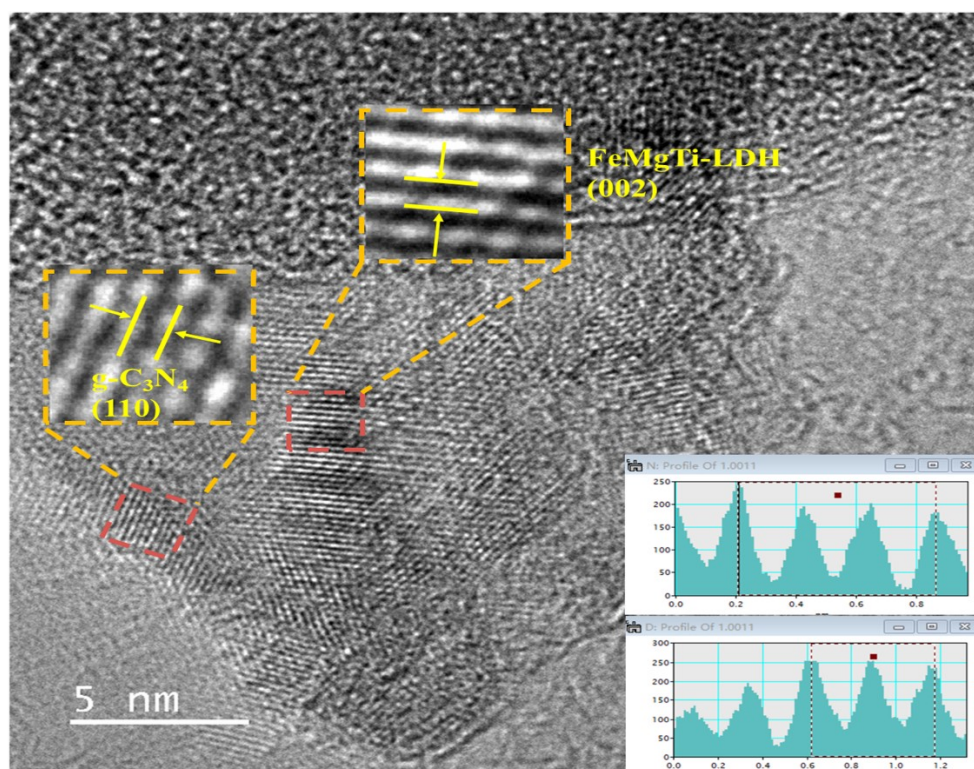

Fig. S3. the HRTEM image of MgFeTi (3:1)-LDH/g-C<sub>3</sub>N<sub>4</sub>

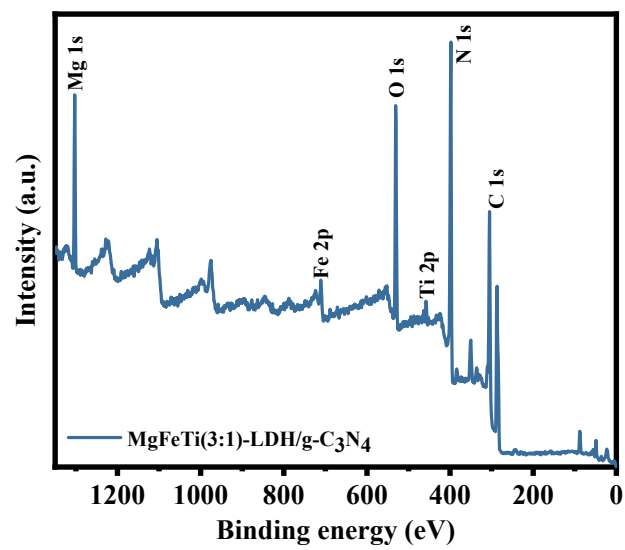

Fig. S4. XPS survey spectra of MgFeTi (3:1)-LDH/g-C<sub>3</sub>N<sub>4</sub>



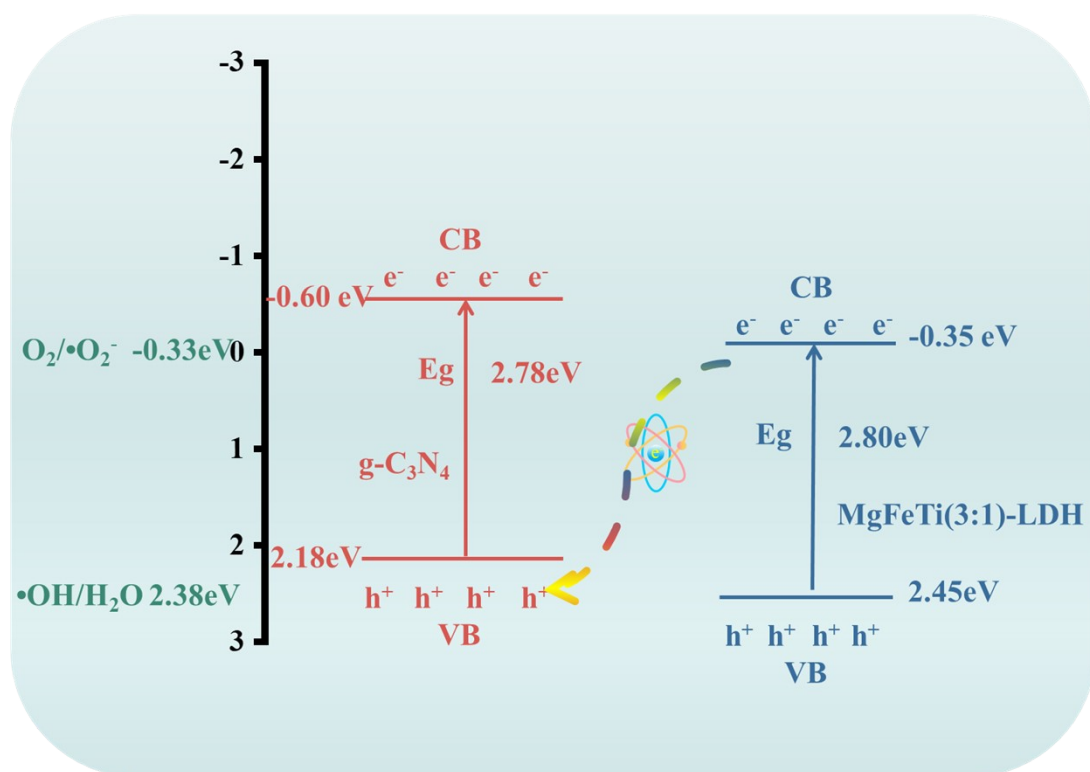

Fig. S5. CB and VB of the MgFeTi (3:1)-LDH/g-C<sub>3</sub>N<sub>4</sub>

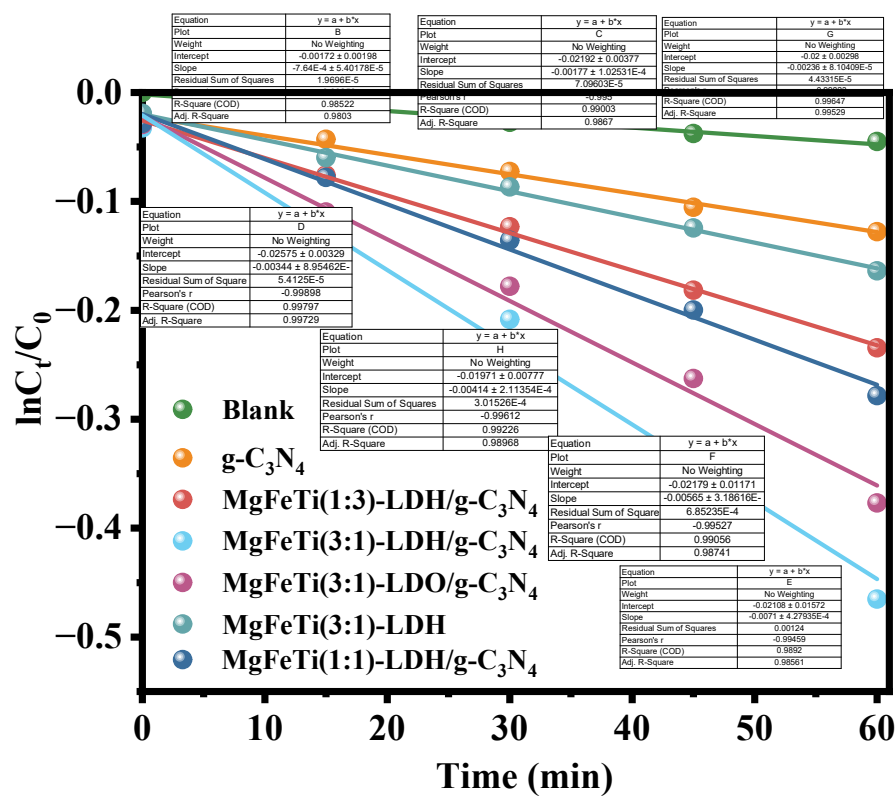

Fig. S6. kinetics of degradation reaction

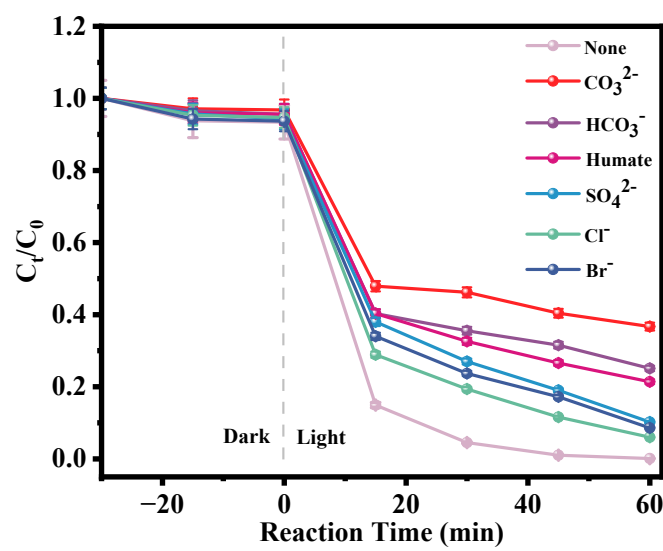

Fig. S7. The effect of various inorganic anions and humate on degradation efficiency

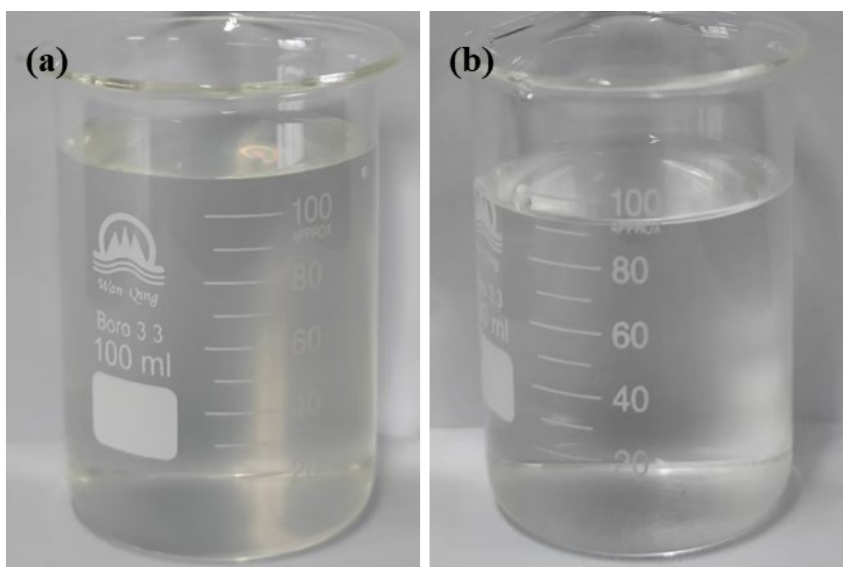

Fig.S8. The decolorization efficiency of MgFeTi-LDH/g-C<sub>3</sub>N<sub>4</sub> composites for TCH in actual effluents (a) TCH in actual effluents, (b) Decolorized TCH solution

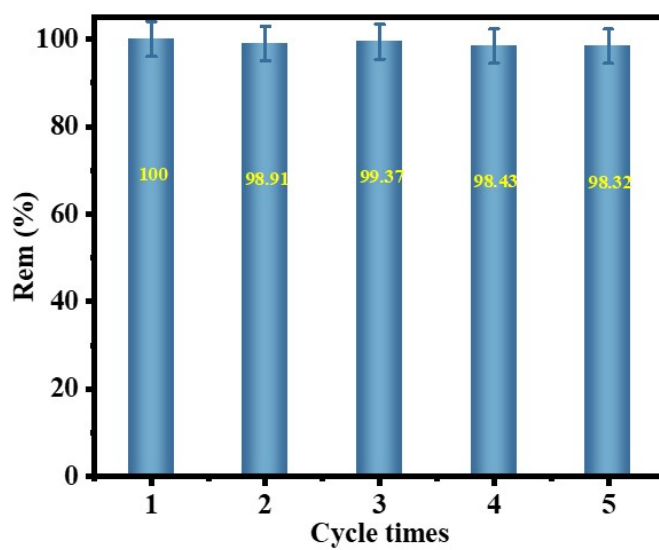

Fig. S9. Reusability performance of MgFeTi(3:1)-LDH/g-C<sub>3</sub>N<sub>4</sub>

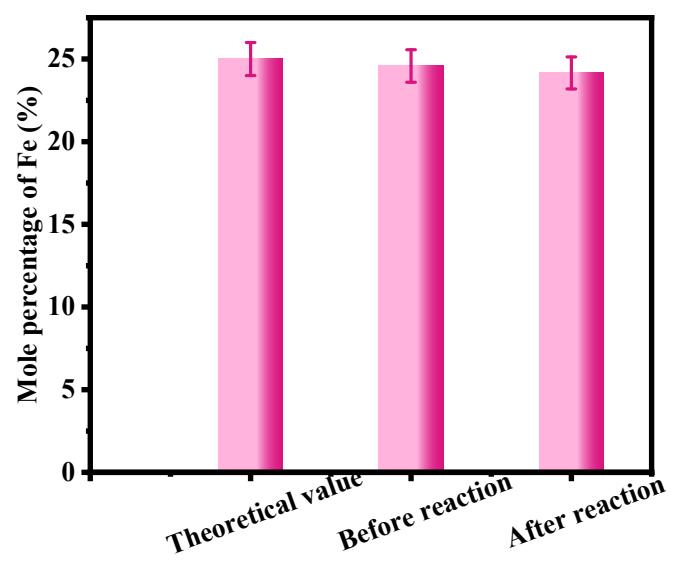

Fig. S10. The Fe mole percentage from ICP

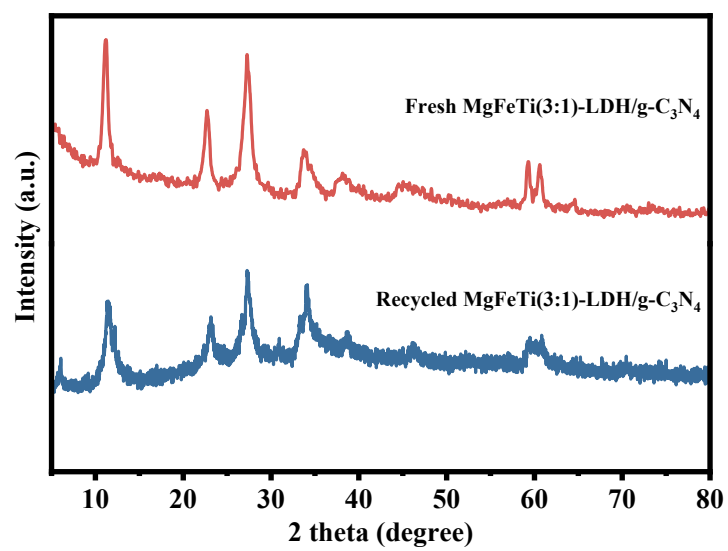

Fig. S11. The XRD patterns of recycled MgFeTi(3:1)-LDH/g-C<sub>3</sub>N<sub>4</sub> and fresh MgFeTi(3:1)-LDH/g-C<sub>3</sub>N<sub>4</sub>

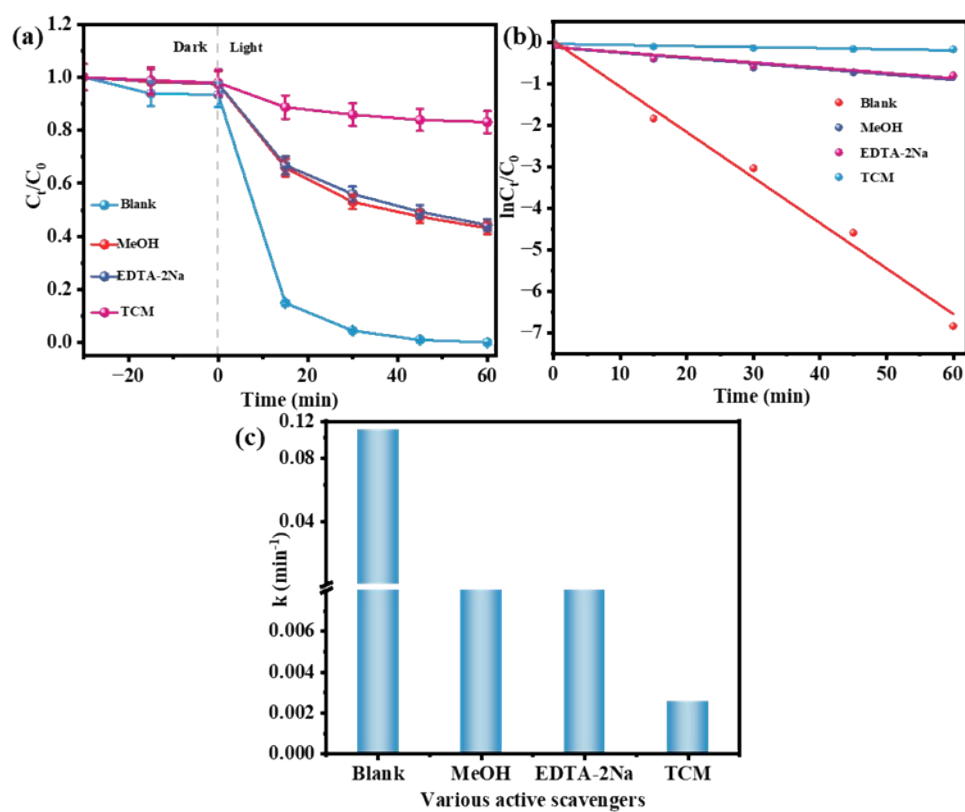

Fig. S12. The effects of various scavengers on (a)  $C_t/C_0$ , (b)  $\ln C_t/C_0$ , (c)  $k$

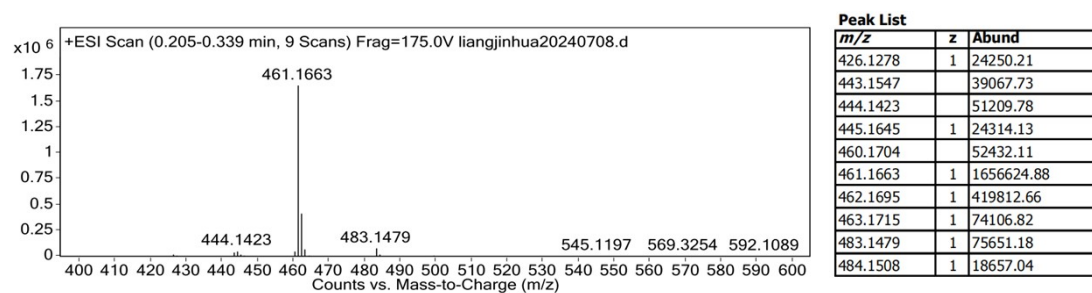

Fig.S13. LC-MS spectra of TCH photocatalytic degradation recorded by MgFeTi(3:1)-LDH/g-C<sub>3</sub>N<sub>4</sub> at 0 min

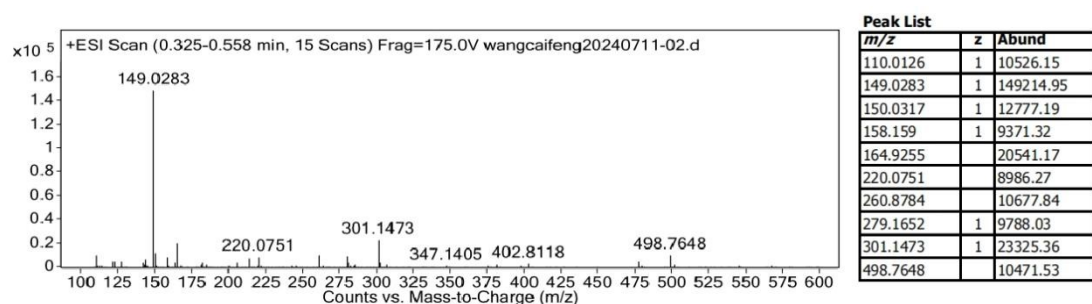

Fig. S14. LC-MS spectra of TCH photocatalytic degradation recorded by MgFeTi(3:1)-LDH/g-C<sub>3</sub>N<sub>4</sub> at 30 min



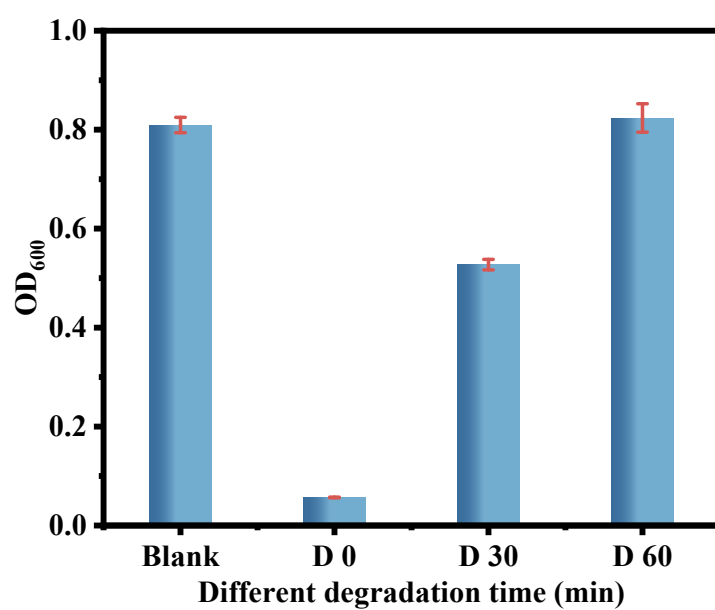

Fig. S15. Optical density (OD<sub>600</sub>) values of degradation TCH at different time periods over MgFeTi (3:1)-LDH/g-C<sub>3</sub>N<sub>4</sub>
